# Supplementary material
Source: PubMed Central journal article supplement (PMC6486740)
Supplement: pnas.1817665116.sapp.pdf [file pnas.1817665116.sapp.pdf]

## Supporting Information

### Photocycle-dependent conformational changes in the proteorhodopsin cross-protomer Asp-His-Trp triad revealed by DNP-enhanced MAS-NMR

Jakob Maciejko, Jagdeep Kaur, Johanna Becker-Baldus and Clemens Glaubitz\*

Institute for Biophysical Chemistry & Centre for Biomolecular Magnetic Resonance

Goethe-University Frankfurt, Germany

(\*) Corresponding author.

Email: [glaubitz@em.uni-frankfurt.de](mailto:glaubitz@em.uni-frankfurt.de)

Institute of Biophysical Chemistry

Goethe University Frankfurt

Max-von-Laue-Str. 9

60438 Frankfurt am Main

Germany

Tel.: +49-69-798-29927

Fax.: +49-69-798-29929

## Material & Methods

### *Sample preparation*

The GPR gene (eBAC31A08) was cloned into a pET26b(+) vector with an adjacent TEV-protease cleavage site and 6x-His-Tag for purification. All mutations were introduced by PCR amplification of the vector with mutagenic primers and correct sequences were verified at Eurofins MWG Operon. Expression and purification of GPR<sub>WT</sub> and GPR mutants was carried out as described before (1, 2). Labeled amino acids (histidine and lysine) or amino acid precursors (indole, for tryptophan labeling) were added to growing *E. coli* C43(DE3) cells once they reached an OD<sub>600</sub> of 0.4. After purification and elution of the protein from Ni-NTA, the high imidazole concentration was removed by buffer exchange to TEV-cleavage buffer (150 mM NaCl, 50 mM Tris pH 8, 1 mM β-mercaptoethanol and 0.5 mM EDTA) with a PD-10 desalting column (GE Healthcare). For TEV-cleavage, TEV-protease was added to the GPR solution in a 1:5 (w/w) ratio and incubated overnight at room temperature under mild shaking. The next day TEV-protease was removed by Ni-NTA binding for 1 h at room temperature, and cleaved GPR without a 6x-His-Tag was eluted from the column. Biochemical analysis of the protein was conducted via SDS-PAGE, BN-PAGE, pH-titrations and Western-Blot (α-6x-His-Tag-alkaline phosphatase conjugated antibody (ABCAM)) as described by us before (2). GPR was reconstituted in 1,2-dimyristoyl-sn-glycero-3-phosphocholine (DMPC):1,2-dimyristoyl-sn-glycero-3-phosphate (DMPA) (9:1) proteoliposomes in a 1:2 protein to lipid (w/w) ratio using Bio-beads, according to the manufacturers instruction. Reconstitution and preparation of mixed-labeled GPR complexes was done as described before (2).

Light induced proton transport was probed on live C43(DE3) *E. coli* cells with heterologously expressed wild-type GPR or GPR mutants as described before (3-5). After expression, cells were washed several times and transferred into Pumping Buffer (10 mM NaCl, 10 mM MgCl<sub>2</sub>, 1 mM CaCl<sub>2</sub>). The OD<sub>600</sub> was set to 16. 1 ml of the cell suspension was used for proton transport measurements. The cell suspension was subjected to an illumination protocol, consisting of 1 min in the dark, 520 nm illumination for 4 min and 2 min in the dark, during which the pH was constantly measured every 4 s under mild stirring.

### *DNP-enhanced solid-state NMR*

For DNP-enhancement, reconstituted GPR samples were doped with AMUPol (6). Proteoliposome pellets were covered with 20 mM AMUPol solution (60% D<sub>2</sub>O, 30% glycerol-d<sub>8</sub>, 10% H<sub>2</sub>O) and were incubated overnight at 4 °C. Subsequently, the solution was completely removed and 1.5-2 mg of protein was packed into a 3.2 mm sapphire rotor. The sample was spread evenly in the MAS rotor by spinning the rotor at room temperature using a Bruker rotor testing device. Illumination procedures of the sample were executed as described before (7, 8). A high-power LED light (Mightex) with different wavelength filters was used for illumination. K-state trapping was achieved by illumination of the sample at 100 K for ~40 min with a LED power output of 3.3 W at 470 nm. M-state trapping of the GPR<sub>E108Q</sub> mutant was achieved by illumination at room temperature for 90 s and subsequent freezing in liquid nitrogen. The LED power output for M-state trapping was 0.13 W at 525 nm.

DNP-enhancement solid-state NMR experiments were performed on a Bruker 400 MHz DNP system (400 MHz WB Avance II NMR spectrometer, 263 GHz Gyrotron as microwave source and 3.2 mm HCN LT-MAS probe). All spectra were recorded at 100 K and 8 kHz MAS and microwave power was set to 10.5 W. Referencing for <sup>13</sup>C and <sup>15</sup>N was done indirectly to DSS using the <sup>13</sup>C-CO signal of alanine at 179.85 ppm. For all experiments, 100 kHz decoupling using SPINAL-64 was applied during acquisition. <sup>15</sup>N-CP spectra were recorded with a CP-contact time of 800 μs and 8192 scans. <sup>13</sup>C-double quantum filter (1D-DQF) experiments were obtained with 4096 scans using the POST-C7 sequence for double quantum excitation and reconversion at 0.5 ms. 2D double quantum single

quantum (2D-DQSQ) spectra were recorded with 384 scans and 81 increments with a 17.86  $\mu\text{s}$  dwell time.  $^{15}\text{N}$ - $^{15}\text{N}$ -PDSO spectra (9) were recorded with a mixing time of 1 s, 672 scans in the direct dimension and 110 increments in the indirect dimension with a dwell time of 125  $\mu\text{s}$ . 2D-TEDOR experiments were recorded as described before (2), using a mixing time of 10.25 ms (40 rotor cycles), 1024 scans (4928 scans for GPR<sub>WT</sub>-mix) in the direct dimension and 32 increments in the indirect dimension with a dwell time of 125  $\mu\text{s}$ .

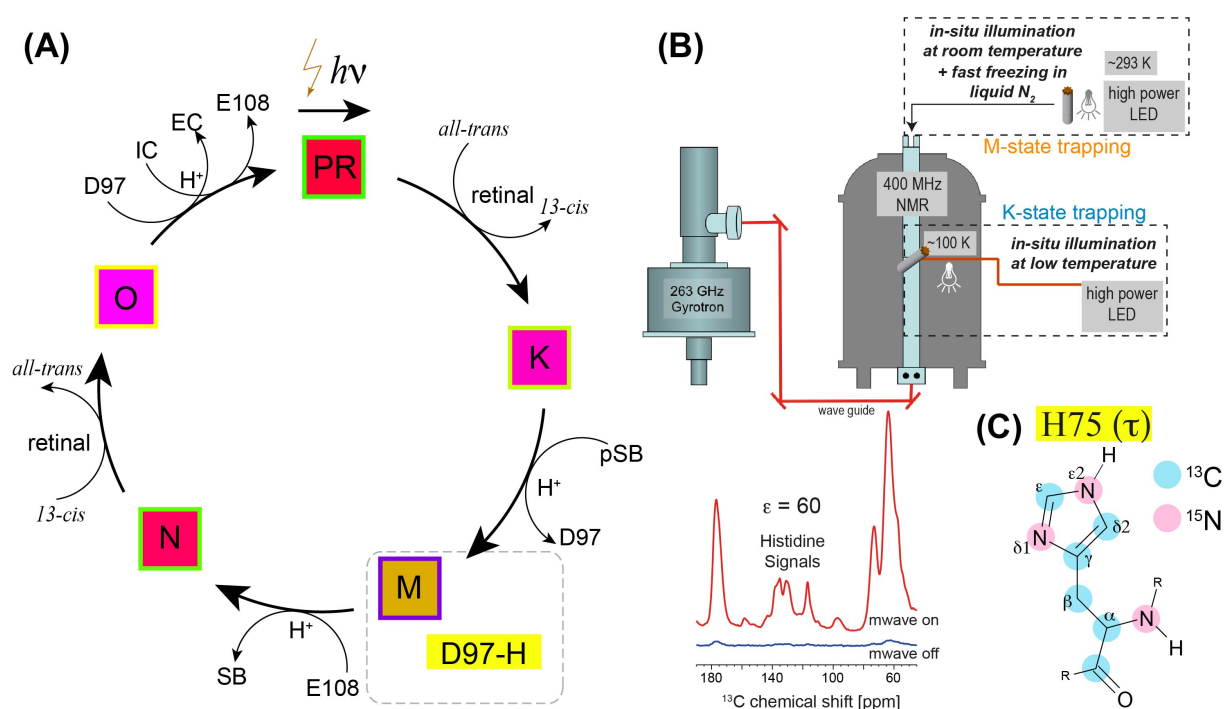

**Figure S1. Procedures for trapping photocycle intermediates of GPR. (A)** Photocycle of green proteorhodopsin (see text for further details). **(B)** DNP-enhanced solid-state NMR experimental setup and sample illumination procedures for K-state and M-state trapping. A 60-fold signal enhancement ( $\epsilon=60$ ) is obtained upon microwave irradiation. **(C)** Fully labeled ( $^{13}\text{C}_6$ ,  $^{15}\text{N}_3$ )-H75 in the ( $\tau$ )-state.

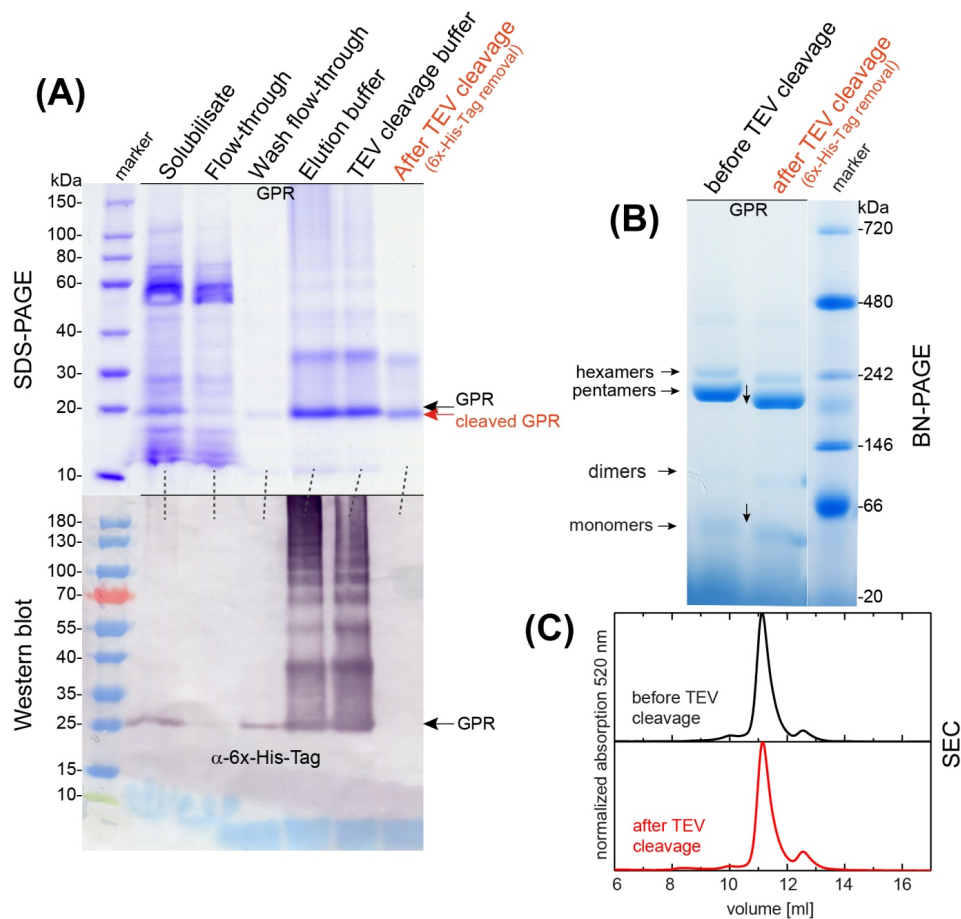

**Figure S2. Purification of GPR and 6x-His-Tag removal by TEV-protease cleavage. (A)** SDS-PAGE confirms the successful purification and TEV-protease cleavage of the 6x-His-Tag by a shift of the GPR band (GPR, cleaved GPR). The Western blot shows no 6x-His-Tag signal for cleaved GPR. **(B)** BN-PAGE of GPR reconstituted into proteoliposomes also shows a small shift of the protein bands but also confirms the dominant pentameric state after TEV-protease cleavage **(C)** Size exclusion chromatography (SEC) shows similar elution profiles of cleaved and non-cleaved GPR.

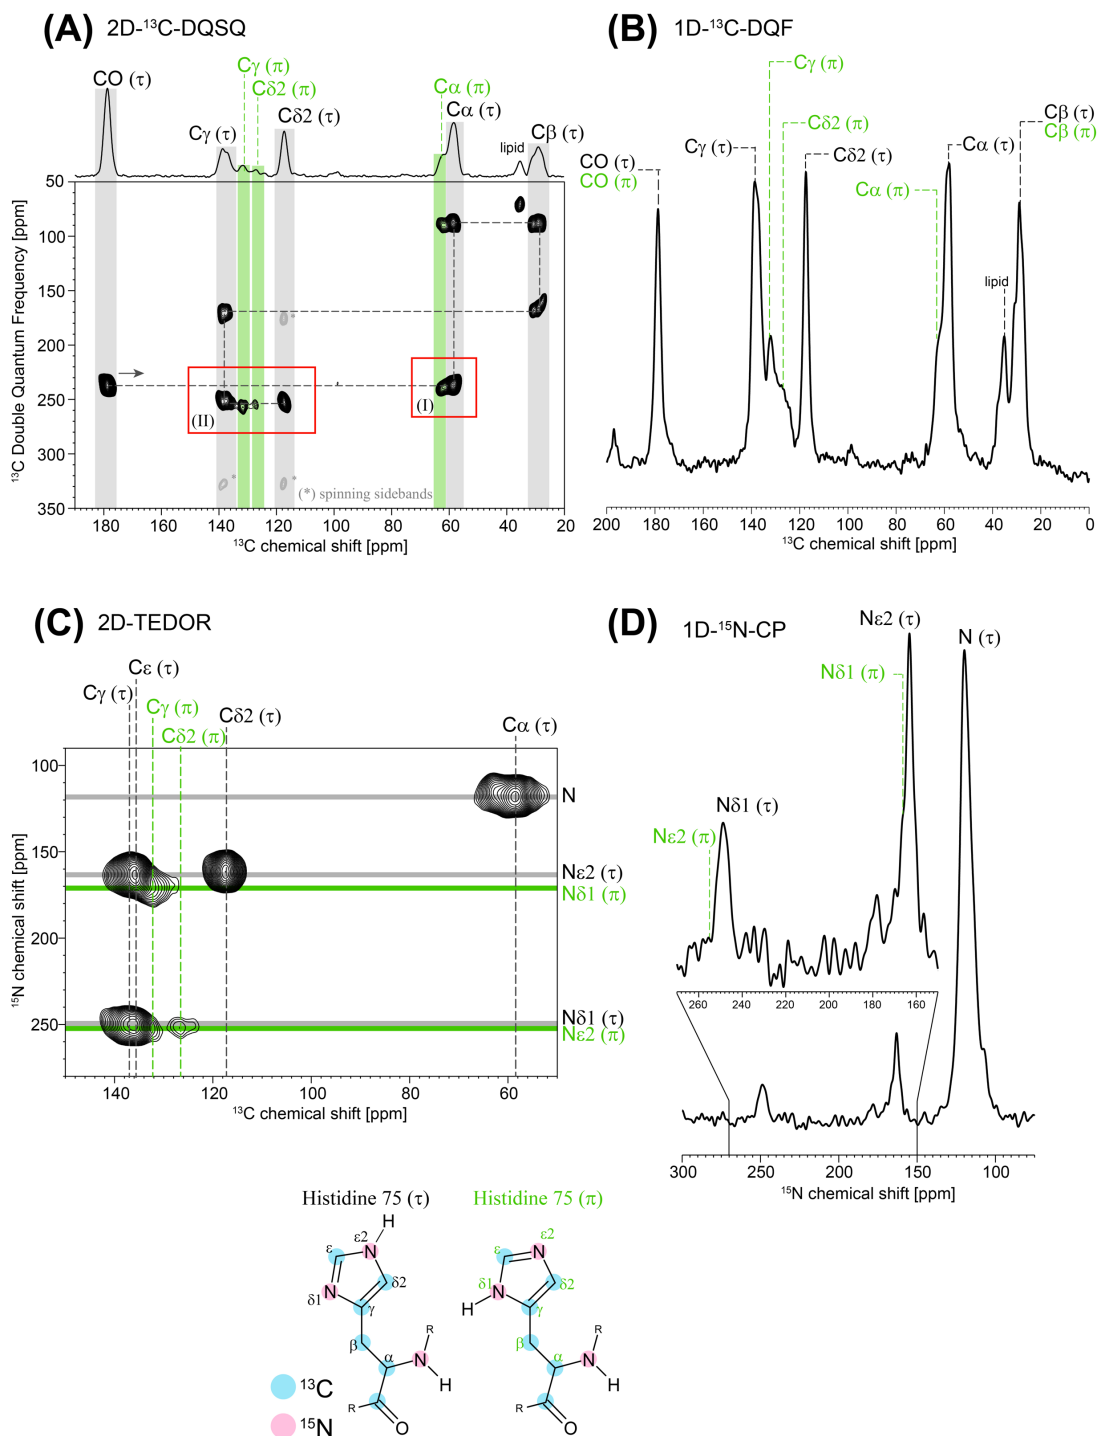

**Figure S3.**  $^{13}\text{C}$  and  $^{15}\text{N}$  chemical shift assignments of H75 in ground state ( $^{13}\text{C}_6$ - $^{15}\text{N}_3$ -His)-GPR<sub>WT</sub> (wild-type). (A) 2D  $^{13}\text{C}$ -double quantum-single quantum (DQSQ) experiment (10). ( $\tau$ )-state signals are labeled in black and ( $\pi$ )-state signals are labeled in green. The assignment walk through H75 in GPR<sub>WT</sub> begins at the arrow and shows connectivity patterns starting from CO( $\tau$ ) over C $\alpha$ ( $\tau$ ), C $\beta$ ( $\tau$ ), C $\gamma$ ( $\tau$ ) and finishes at C $\delta$ 2( $\tau$ ). ( $\tau$ )-state is the dominant state of H75 in GPR<sub>WT</sub>, but also small subpopulations of ( $\pi$ )-state signals (green labels) can be detected for C $\alpha$  (box I), C $\gamma$  and C $\delta$ 2 (box II). (B) The 2D-DQSQ sequential walk allows the assignment of 1D- $^{13}\text{C}$ -double quantum filter (DQF) spectra. (C) 2D TEDOR spectrum (11) shows  $^{13}\text{C}$ - $^{15}\text{N}$ -correlations of a dominating ( $\tau$ )-state and a small subpopulation of ( $\pi$ )-state. (D)  $^{15}\text{N}$ -Cross polarization ( $^{15}\text{N}$ -CP) spectrum. Chemical shifts are summarized in Tab. S1.

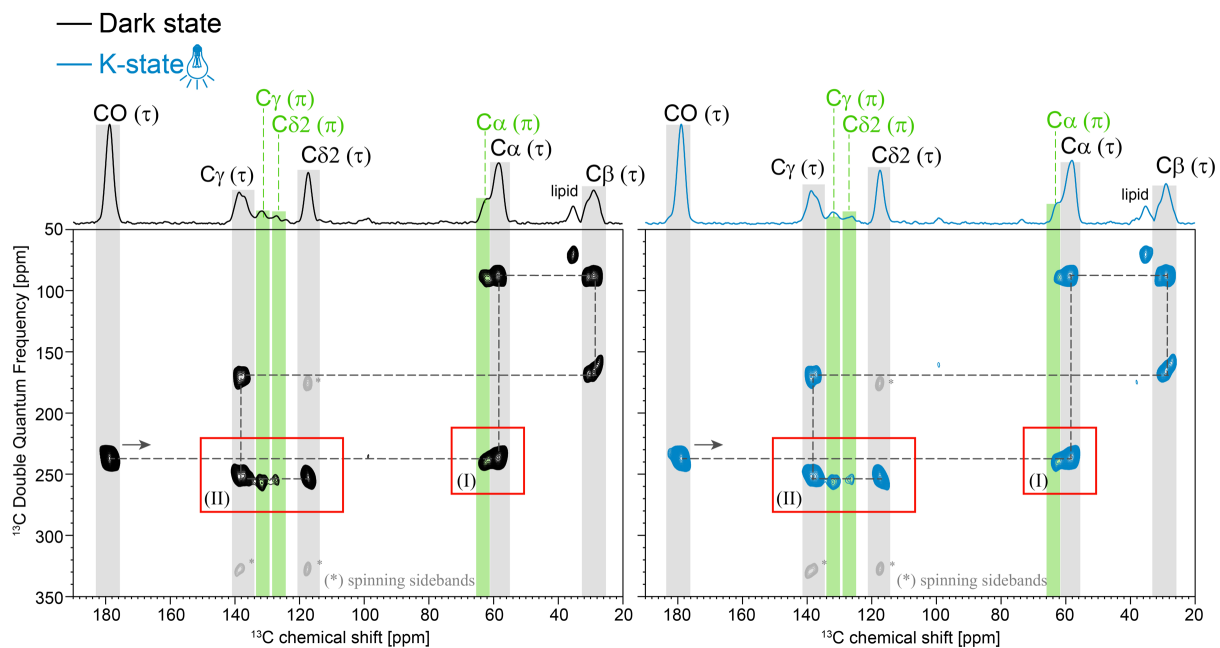

**Figure S4. K-state trapping of  $\text{GPR}_{\text{WT}}$ .** 2D  $^{13}\text{C}$ -double quantum-single quantum (DQSQ) sequential walks of  $(^{13}\text{C}_6\text{-}^{15}\text{N}_3\text{-His})\text{-GPR}_{\text{WT}}$  in the dark state (black, left) and illuminated K-state (blue, right). No light-induced chemical shift or intensity changes can be observed for  $(\tau)$ -state or  $(\pi)$ -state signals of  $\text{C}\alpha$  (I),  $\text{C}\gamma$  or  $\text{C}\delta 2$  (II) in H75.

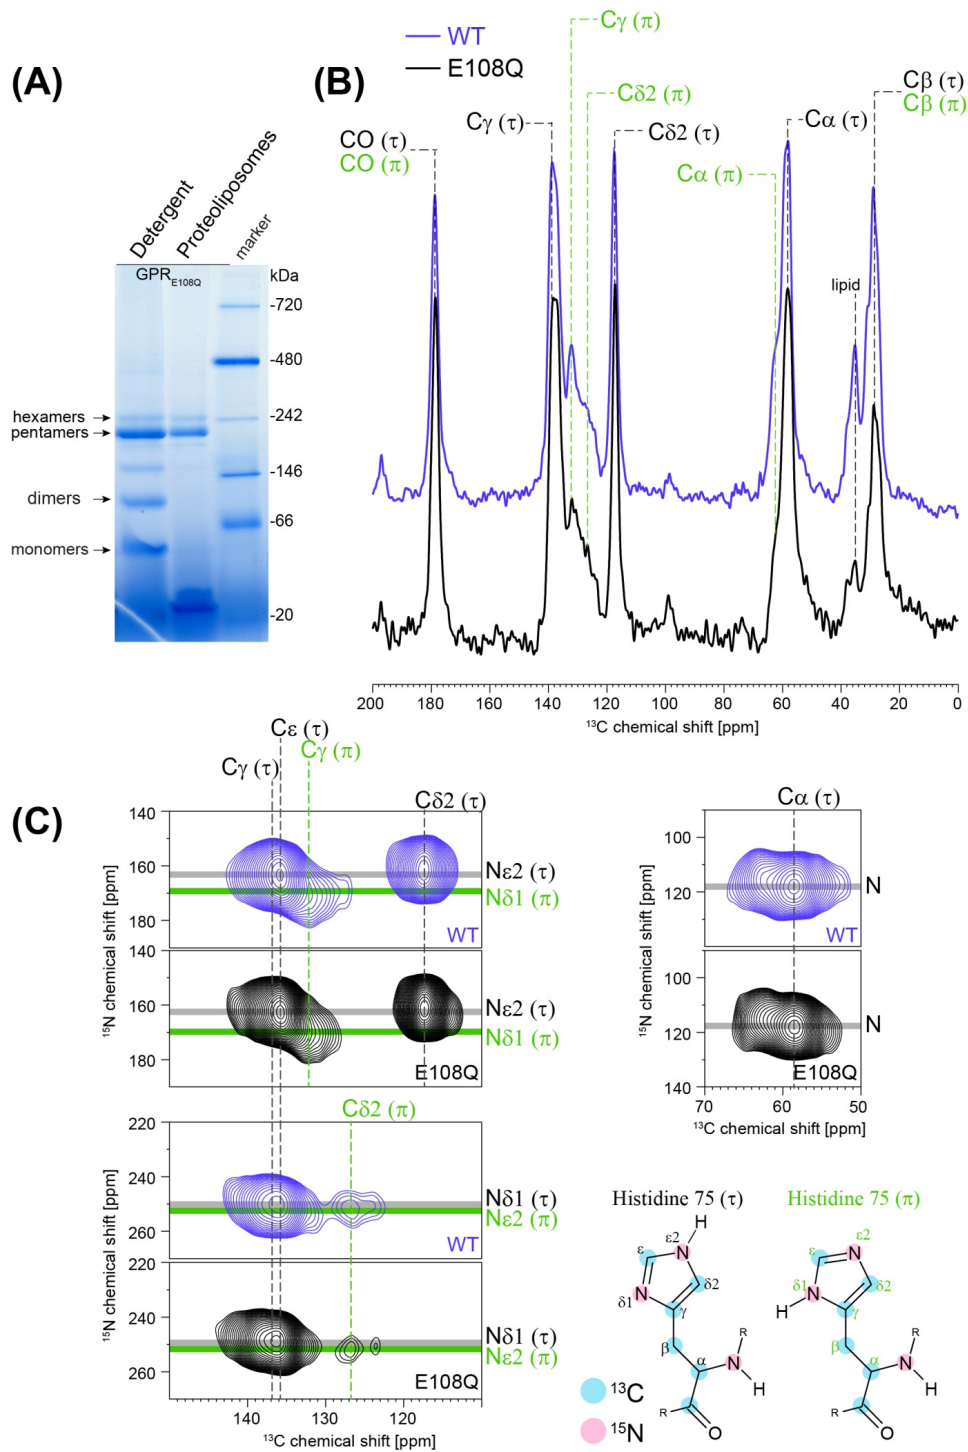

**Figure S5. Comparison of GPR<sub>WT</sub> and the M-state trappable GPR<sub>E108Q</sub> mutant.** (A) The M-state trappable GPR<sub>E108Q</sub> mutant shows a similar oligomerisation pattern as GPR<sub>WT</sub> in BN-PAGE. (B) 1D-DQF spectra of (<sup>13</sup>C<sub>6</sub>-<sup>15</sup>N<sub>3</sub>-His)-GPR<sub>WT</sub> (purple) and (<sup>13</sup>C<sub>6</sub>-<sup>15</sup>N<sub>3</sub>-His)-GPR<sub>E108Q</sub> (black) (C) 2D-TEDOR spectra of (<sup>13</sup>C<sub>6</sub>-<sup>15</sup>N<sub>3</sub>-His)-GPR<sub>WT</sub> (purple) and (<sup>13</sup>C<sub>6</sub>-<sup>15</sup>N<sub>3</sub>-His)-GPR<sub>E108Q</sub> (black). (τ)-state signals are labeled in black and (π)-state signals are labeled in green. The E108Q mutation does not show any structural implications for the protein or for H75 signals.

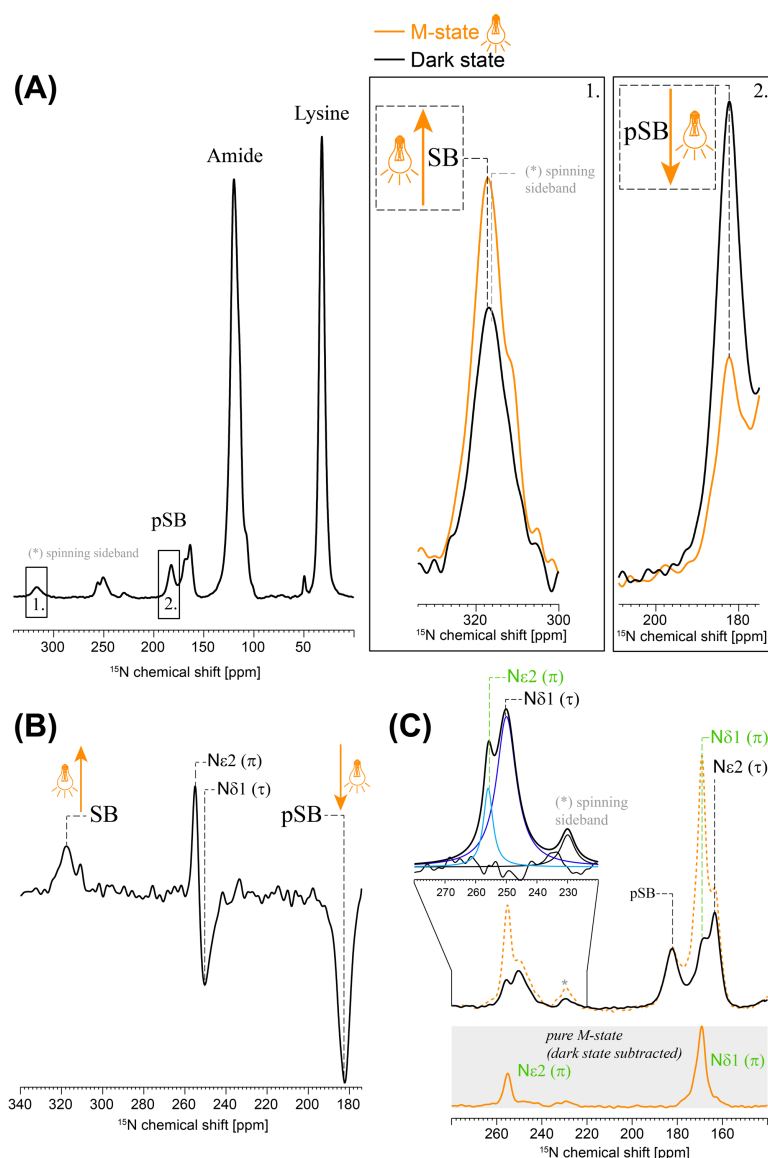

**Figure S6. Deprotonation of the protonated Schiff base (pSB) during M-state trapping.** (A)  $^{15}\text{N}$ -CP spectra of ( $^{13}\text{C}_6$ - $^{15}\text{N}_3$ -His,  $^{15}\text{N}\epsilon$ -Lys)-GPR<sub>E108Q</sub> in the dark state (black) and after illumination at RT with green light and subsequent freezing (orange). A significant reduction of the pSB signal at 182 ppm is observed. Simultaneously, the deprotonated SB signal appears at 317 ppm after illumination, confirming the specific formation of the M-state. For technical reasons, this resonance coincided with the amide spinning sideband (\*). Therefore, the difference spectrum (M-state *minus* dark state) is plotted in (B) in order to subtract this spectral contribution from the spinning sideband. The intensity differences between SB and pSB resonances are caused by different cross-polarization efficiencies. Furthermore, a complete conversion into M-state is difficult to achieve (8), leaving a small fraction of dark state GPR after illumination as seen for the pSB resonance in (A). The changes in the H75 resonances in the M-state are explained in the main text. (C) As the conversion to M-state trapping after illumination is not complete, the illuminated sample contains a dark state population of the histidine. In order to determine the correct ( $\pi$ )/( $\tau$ )-ratio in the M-state, the dark state and M-state spectra were normalized with respect to the pSB signal. The fraction of the dark state spectrum was then subtracted from the M-state spectrum, resulting in the dark state corrected (pure M-state) spectrum, which shows almost 100% ( $\pi$ )-state and no presence of ( $\tau$ )-state signals. In order to determine the ratio between ( $\pi$ ) and ( $\tau$ ) in the dark state, the signals in the region with no other spectral overlap (around 250 ppm) were deconvoluted. The deconvoluted signals for  $\text{N}\epsilon 2$  ( $\pi$ ) and  $\text{N}\delta 1$  ( $\tau$ ) in the dark state show a ratio of approx. 1:4, which is similar to the tautomeric ratio observed for aqueous histidine.



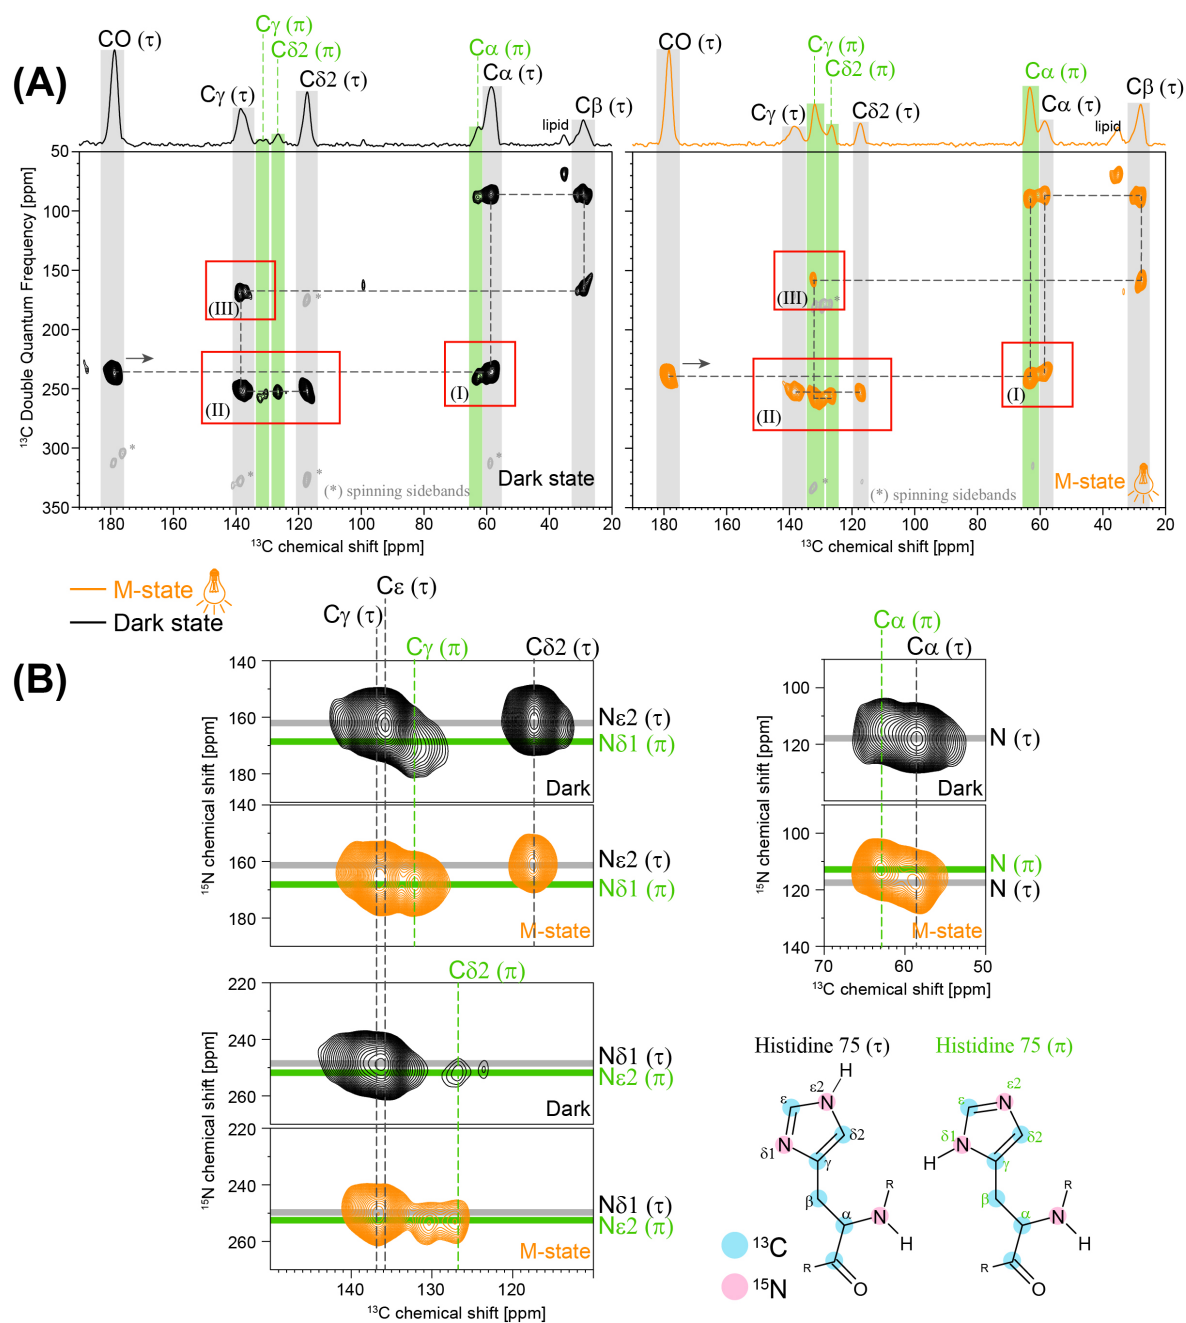

**Figure S7. Effect of M-state trapping on H75  $^{15}\text{N}$  and  $^{13}\text{C}$  signals in 2D-DQSQ and 2D-TEDOR spectra.** (A) 2D-DQSQ spectra of ( $^{13}\text{C}_6$ - $^{15}\text{N}_3$ -His)-GPR<sub>E108Q</sub> in the dark state (black) and illuminated M-state (orange). ( $\tau$ )-state signals are labeled in black and ( $\pi$ )-state signals are labeled in green. The assignment walk through H75 in dark state begins at the arrow and shows connectivity patterns starting from  $\text{CO}(\tau)$  over  $\text{C}\alpha(\tau)$ ,  $\text{C}\beta(\tau)$ ,  $\text{C}\gamma(\tau)$  and finishes at  $\text{C}\delta 2(\tau)$  (black labels). In the dark 2D-DQSQ spectrum also small subpopulations of ( $\pi$ )-state signals (green labels) can be detected for  $\text{C}\alpha$  (box I),  $\text{C}\gamma$  and  $\text{C}\delta 2$  (II). The illuminated 2D-DQSQ spectrum shows increased signals for  $\text{C}\alpha$  ( $\pi$ ) (I),  $\text{C}\gamma$  ( $\pi$ ) and  $\text{C}\delta 2$  ( $\pi$ ) (II). Box III in the illuminated spectrum confirms that the imidazole ring ( $\pi$ )-state signal at 131.8 ppm indeed belongs to  $\text{C}\gamma$  ( $\pi$ ), as it shows direct connectivity to  $\text{C}\beta$ . Therefore, the other ( $\pi$ )-state signal at 131.8 ppm arising after illumination in box II must belong to  $\text{C}\delta 2$  ( $\pi$ ). (B) 2D-TEDOR spectra of ( $^{13}\text{C}_6$ - $^{15}\text{N}_3$ -His)-GPR<sub>E108Q</sub> in the dark state (black) and M-state (orange) also show a drastic increase of ( $\pi$ )-state subpopulation after illumination.

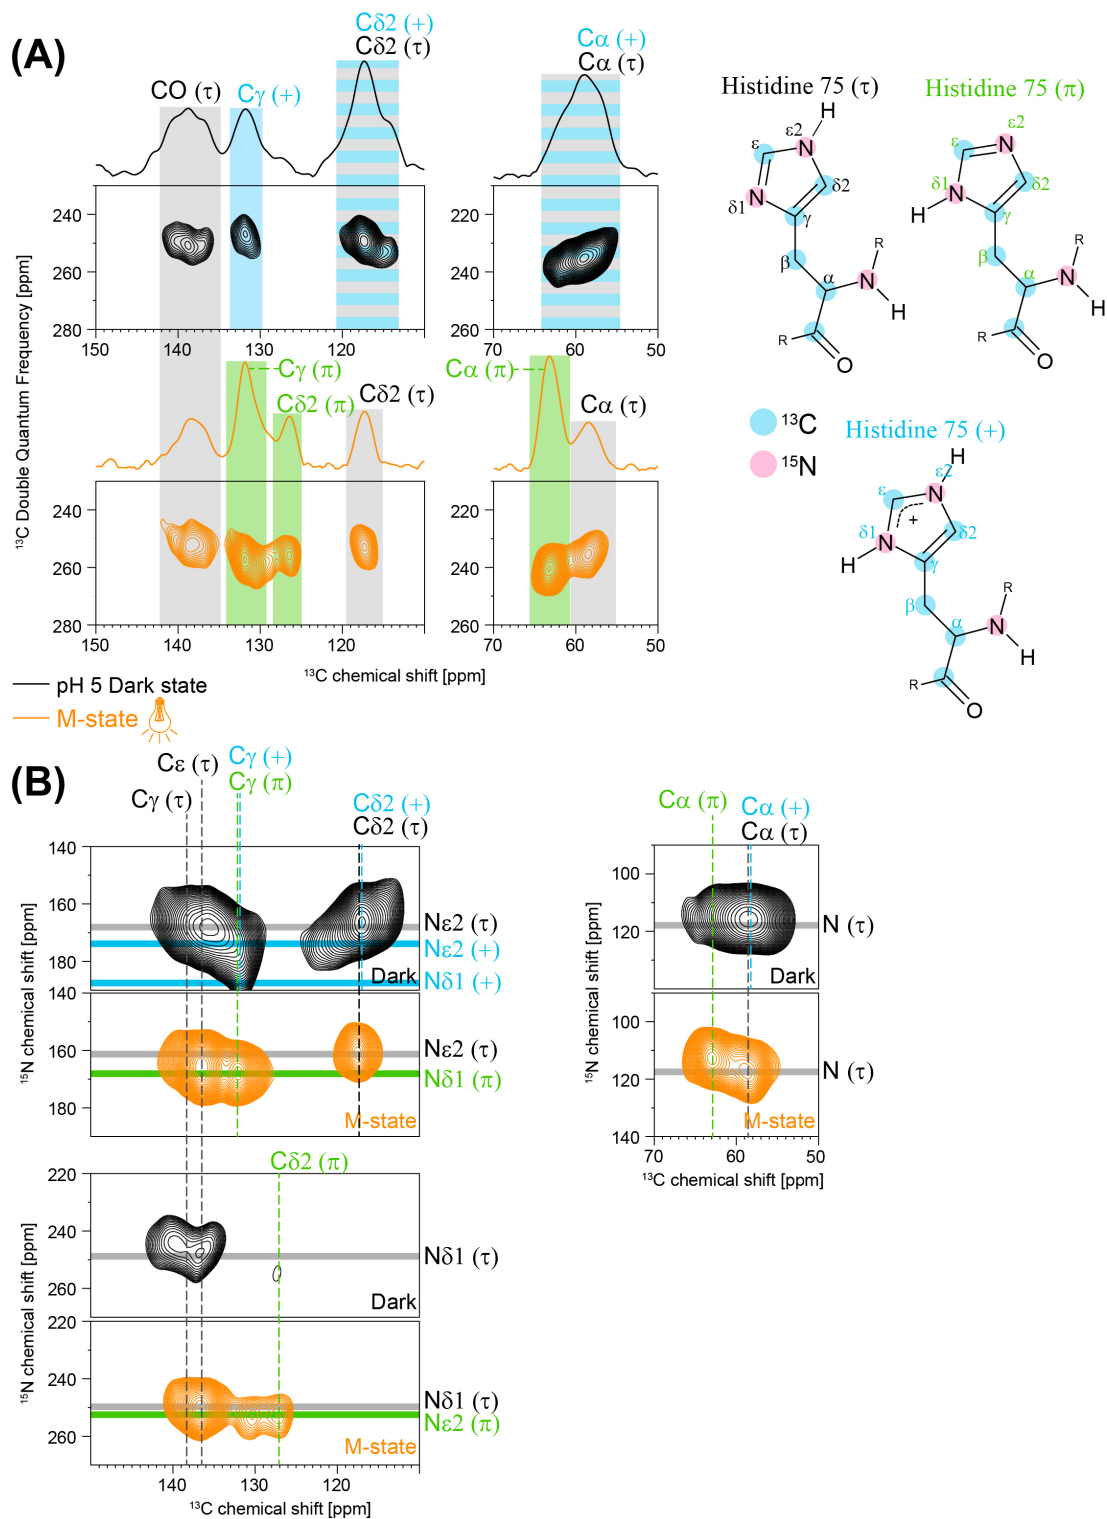

**Figure S8. Comparison of GPR<sub>WT</sub> at pH 5 and M-state trapped GPR<sub>E108Q</sub>.** (A) 2D-DQSQ spectra of ( $^{13}\text{C}_6$ - $^{15}\text{N}_3$ -His)-GPR<sub>WT</sub> in the ground state at pH 5 (black) and ( $^{13}\text{C}_6$ - $^{15}\text{N}_3$ -His)-GPR<sub>E108Q</sub> in the illuminated M-state (orange). ( $\tau$ )-state signals are labeled in black and ( $\pi$ )-state signals are labeled in green. (B) 2D-TEDOR spectra of ( $^{13}\text{C}_6$ - $^{15}\text{N}_3$ -His)-GPR<sub>WT</sub> dark state at pH 5 (black) and ( $^{13}\text{C}_6$ - $^{15}\text{N}_3$ -His)-GPR<sub>E108Q</sub> in the illuminated M-state (orange). The dark state spectrum at pH 5 corresponds to the (+)-state of H75 and shows a different signal pattern as compared to the M-state. This excludes signal contributions from the (+)-state in the M-state.

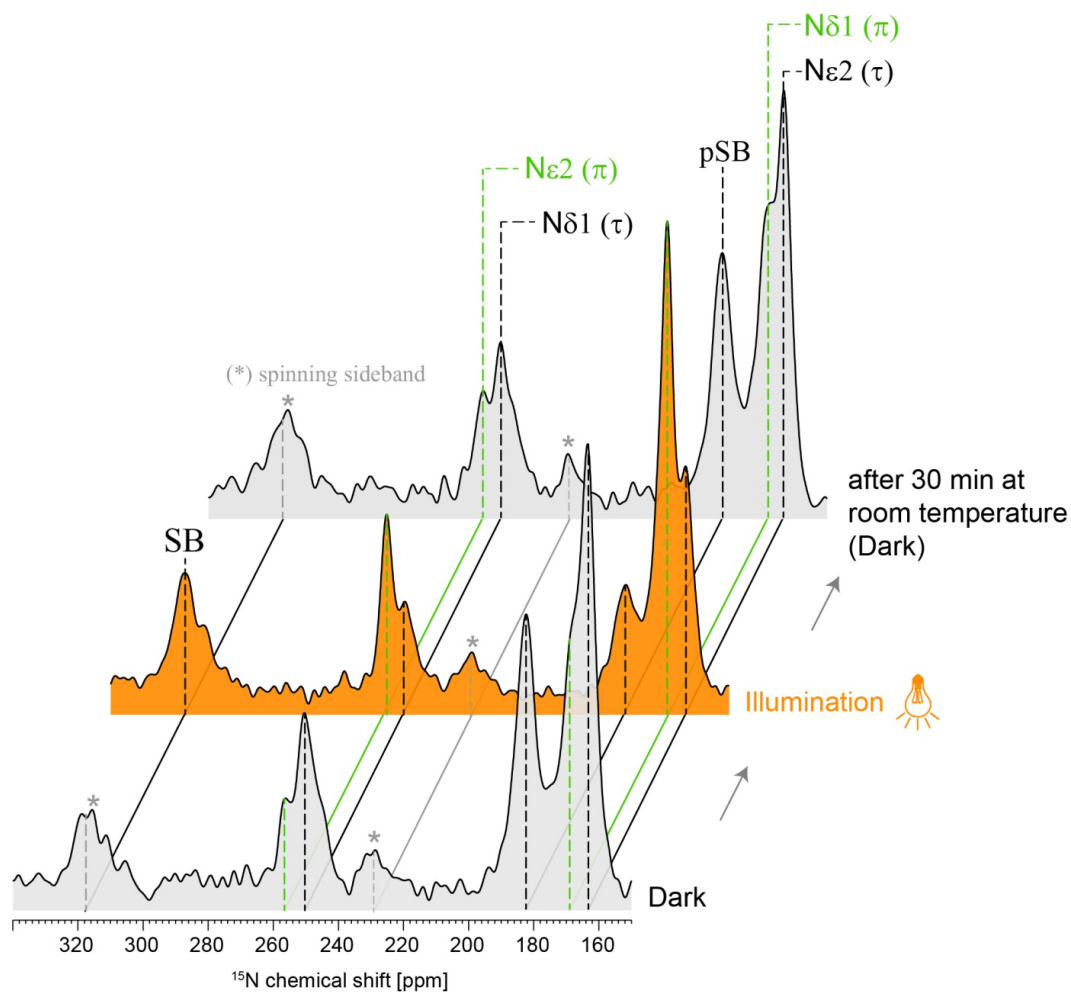

**Figure S9. Reversibility of ( $\tau$ ) to ( $\pi$ ) conversion during the photocycle.**  $^{15}\text{N}$ -CP spectra of ( $^{13}\text{C}_6$ - $^{15}\text{N}_3$ -His,  $^{15}\text{N}_\epsilon$ -Lys)-GPR $_{\text{E108Q}}$  before illumination (dark), after illumination and after thawing and incubating for 30 min at room temperature show the reversibility of M-state trapping. ( $\tau$ )-state signals are labeled in black and ( $\pi$ )-state signals are labeled in green. After 30 min relaxation of the GPR $_{\text{E108Q}}$  sample at room temperature in the dark, the ( $\tau$ )-state with protonated N $\epsilon$ 2 and deprotonated N $\delta$ 1 reoccurs to be the dominant H75 state. This shows that the tautomerization effect is reversible and directly linked to the formation of the M-state.

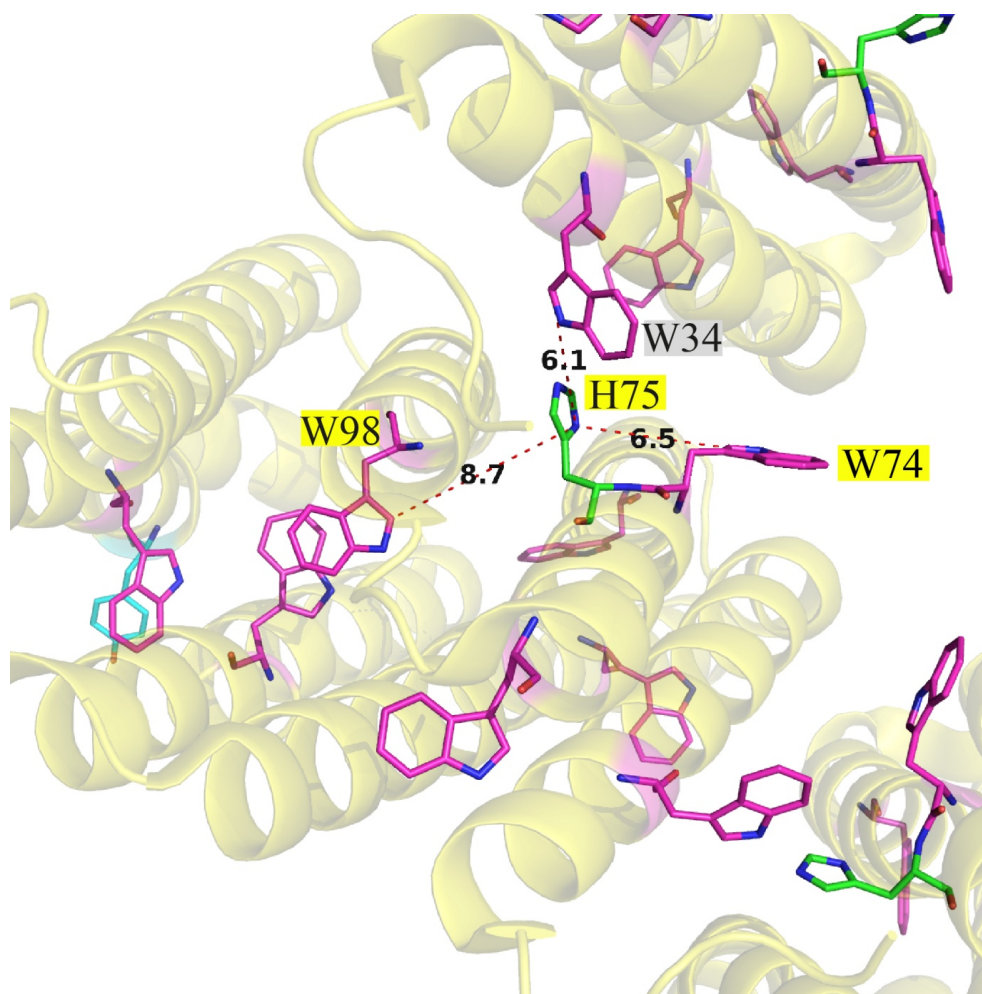

**Figure S10. Distances between H75 and adjacent tryptophan residues in homologous BPR.** The closest tryptophan residues to H75 are W34 across the protomer interface (6.1 Å) and neighbouring W74 (6.5 Å) (distances between W C $\delta$ 1 and H75 N $\delta$ 1). All other tryptophan residues are further than 8.7 Å (W98) away from H75 (image generated from PDB: 4KLY).

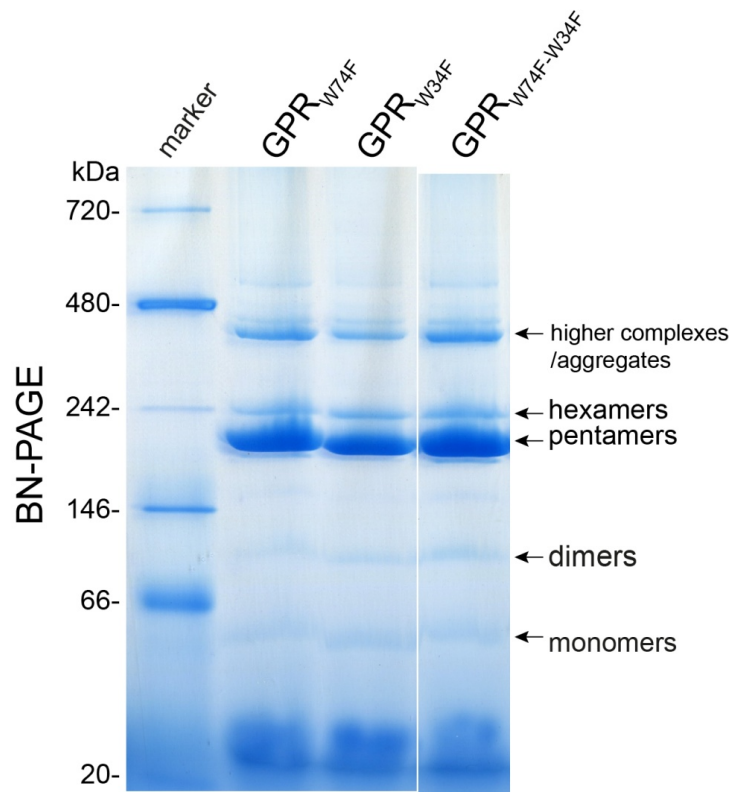

**Figure S11. BN-PAGE of GPR W74 and W34 mutants, reconstituted in proteoliposomes.** The single and double mutations (GPR<sub>W74F</sub>, GPR<sub>W34F</sub>, and GPR<sub>W74F-W34F</sub>) do not affect the oligomeric state of the protein and show a similar oligomerisation pattern as GPR<sub>WT</sub>, with a dominant pentameric form (see Figure S2).

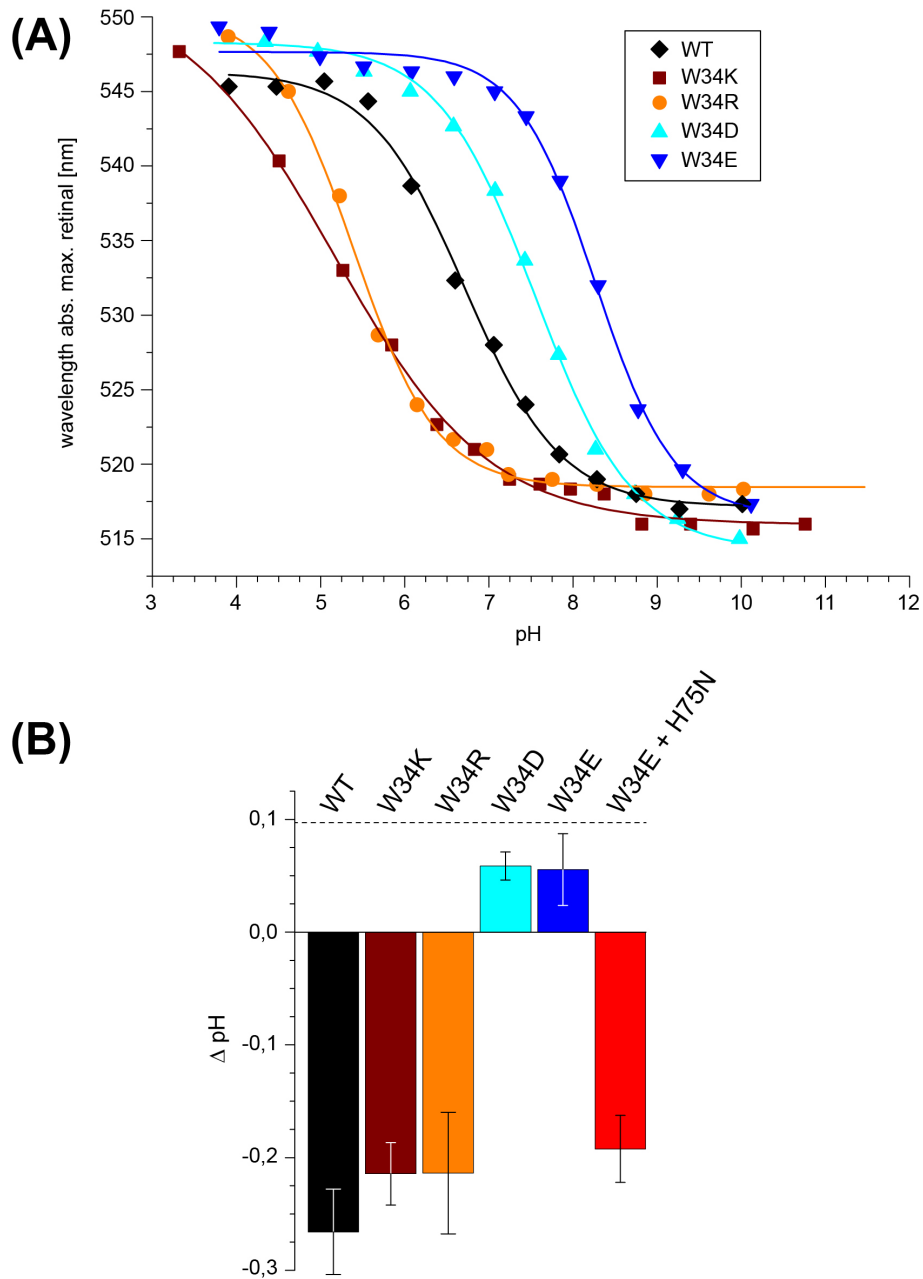

**Figure S12. Effects of different W34 mutations on GPR properties.** (A) pH-titrations of positively and negatively charged GPR W34 mutants. Compared to GPR<sub>WT</sub> (black), positive mutations show a lower D97 pK<sub>a</sub> value and negative mutations show a higher D97 pK<sub>a</sub> value. The measurements were carried out on PR solubilized in DDM as described previously (2). (B) Whole cell proton transport measurements in live *E. coli* cells containing heterologously expressed W34 mutants. The cell suspension was subjected to 520 nm illumination for two minutes, during which the pH was constantly monitored (3-5). GPR<sub>WT</sub> shows a pH decrease upon illumination, corresponding to outward driven proton transport. Positive mutations (GPR<sub>W34K</sub> and GPR<sub>W34R</sub>) do not show a drastic effect on proton transport. Negative mutations (GPR<sub>W34D</sub> and GPR<sub>W34E</sub>) exhibit a reverse proton transport, indicated by pH increase. The double mutation of GPR<sub>W34E-H75N</sub> again reverses the effect and shows normal outward proton transport. This indicates that the effect on the functional residue D97 from the W34E mutation is mediated by H75.

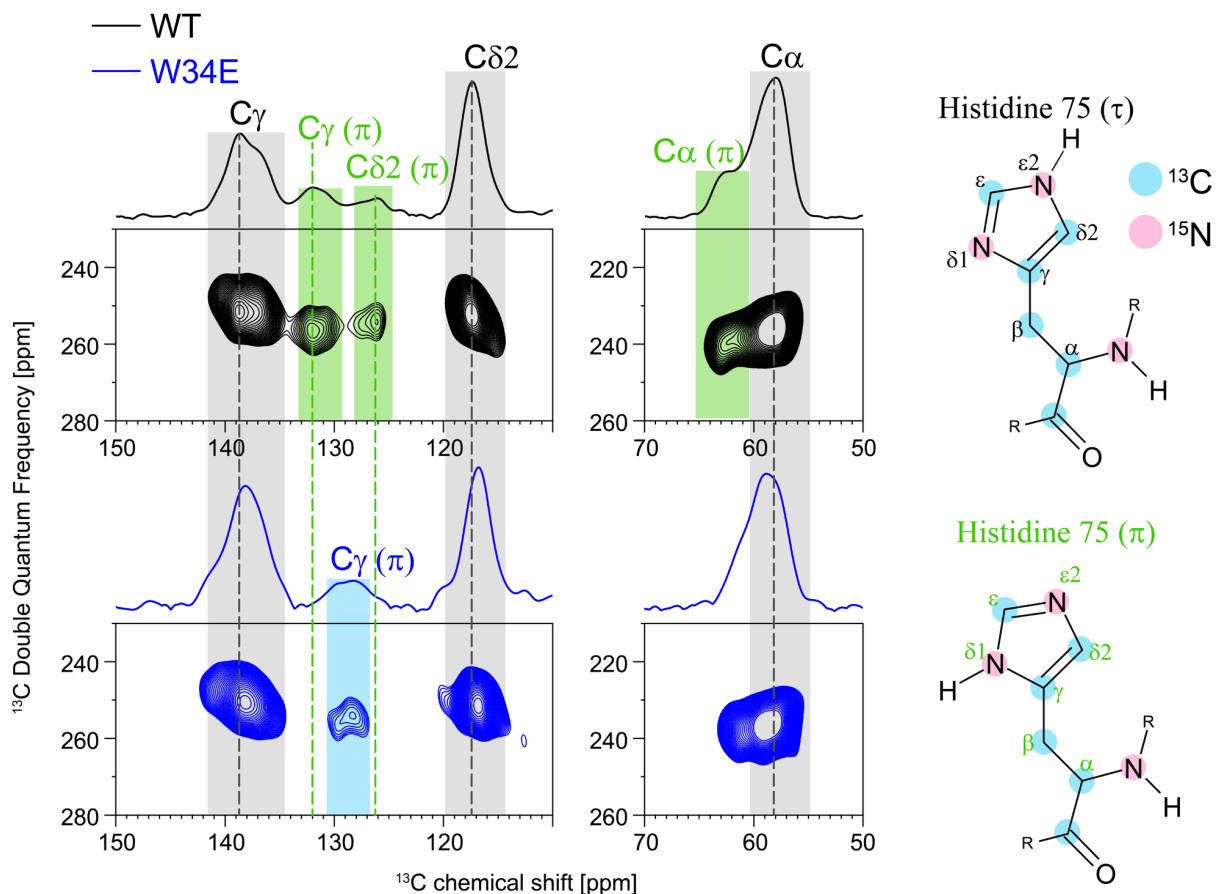

**Figure S13. Comparison of GPR<sub>WT</sub> and GPR<sub>W34E</sub> H75 signals.** 2D-DQSQ spectra are shown of (<sup>13</sup>C<sub>6</sub>-<sup>15</sup>N<sub>3</sub>-His)-GPR<sub>WT</sub> (black) and (<sup>13</sup>C<sub>6</sub>-<sup>15</sup>N<sub>3</sub>-His)-GPR<sub>W34E</sub> (blue) at pH9 ((τ)-state black, (π)-state green). For GPR<sub>WT</sub> the small (π)-state subpopulation is detectable for C<sub>γ</sub>, C<sub>δ2</sub> and C<sub>α</sub>. In the W34E mutant C<sub>γ</sub>(π) is shifted by 4 ppm (129 ppm) and C<sub>δ2</sub>(π) merges with the dominant C<sub>δ2</sub>(τ) signal. The chemical shift changes could reflect alterations of the H75 structure and orientation in GPR<sub>W34E</sub>, which might cause the drastic pK<sub>a</sub> shift of D97 and reverse proton transport.

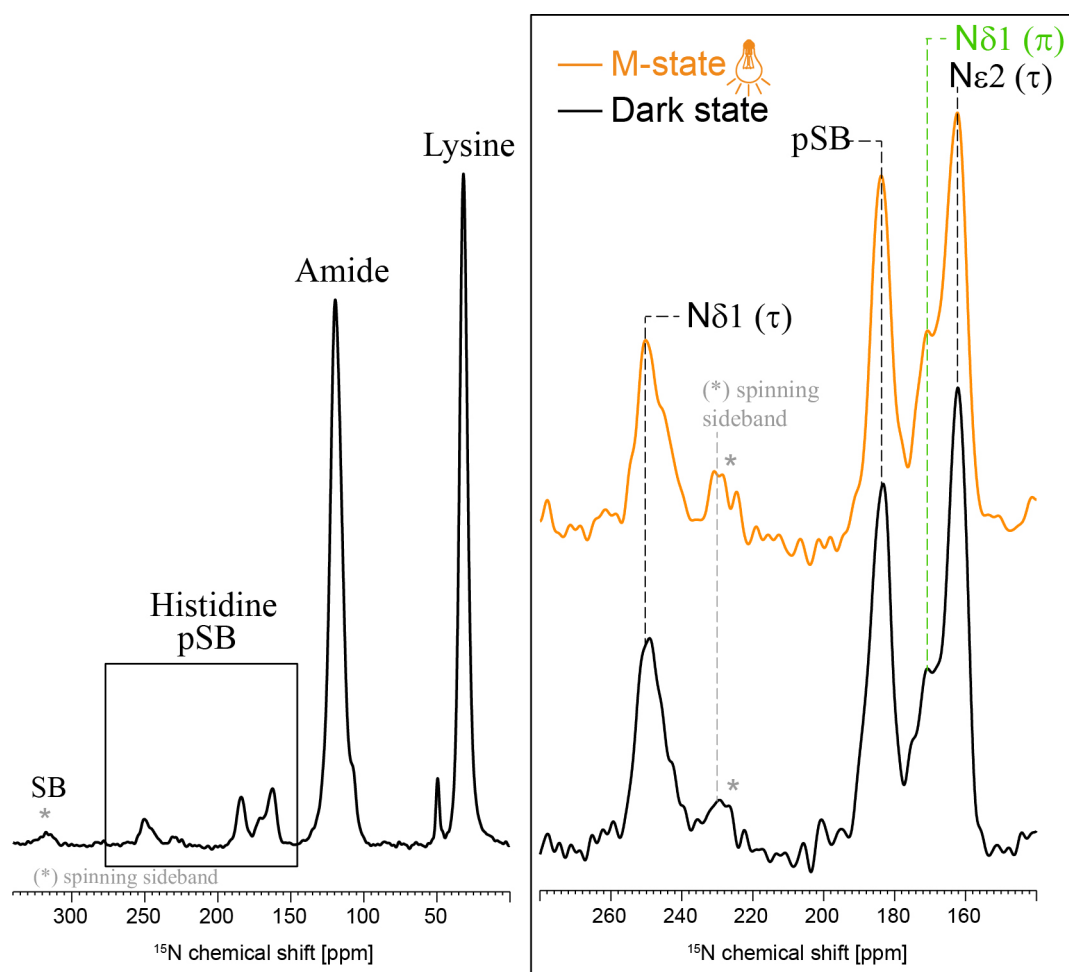

**Figure S14. Illumination of the double mutant  $\text{GPR}_{\text{E108Q-W34E}}$ .**  $^{15}\text{N}$ -CP spectra are displayed of ( $^{13}\text{C}_{\square}$ - $^{15}\text{N}_3$ -His,  $^{15}\text{N}_{\epsilon}$ -Lys)- $\text{GPR}_{\text{E108Q-W34E}}$  in the dark state (black) and M-state (orange) ( $\tau$ -state black,  $\pi$ -state green). No changes in the pSB, SB or the tautomeric state of H75 can be detected.



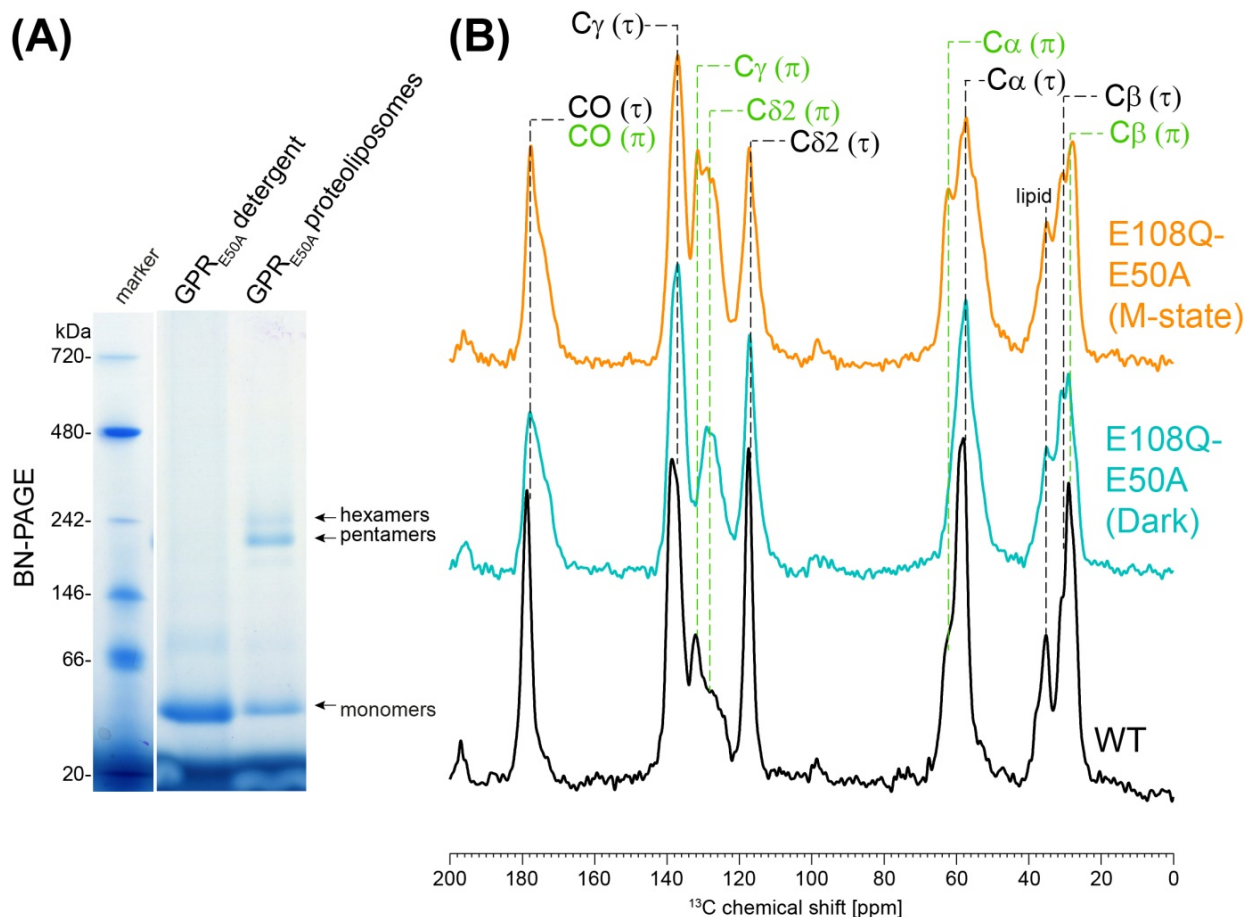

**Figure S15. Effect of oligomer disruption on H75 signals.** (A) BN-PAGE of GPR<sub>E50A</sub> in detergent (0.05% DDM) and reconstituted in proteoliposomes. The E50A mutation causes a disruption of higher oligomeric complexes in detergent, where monomers constitute the dominant form. After reconstitution, a higher amount of monomeric protein remains compared to GPR<sub>WT</sub> (Fig. S2), showing that the mutation has a destabilizing effect on the complex. (B) 1D-DQF spectra of (<sup>13</sup>C<sub>6</sub>-<sup>15</sup>N<sub>3</sub>-His)-GPR<sub>WT</sub> (black), (<sup>13</sup>C<sub>6</sub>-<sup>15</sup>N<sub>3</sub>-His)-GPR<sub>E108Q-E50A</sub> in the dark state (light blue) and (<sup>13</sup>C<sub>6</sub>-<sup>15</sup>N<sub>3</sub>-His)-GPR<sub>E108Q-E50A</sub> in the illuminated M-state (orange). ( $\tau$ )-state signals are labelled in black and ( $\pi$ )-state signals are labelled in green. Compared to GPR<sub>WT</sub>, the disrupting effect of E50A mutation causes peak broadening for <sup>13</sup>C histidine signals, indicating more possible orientations and a higher flexibility of the residue. The H75 tautomerization efficiency is much less for GPR<sub>E108Q-E50A</sub>, indicating that a stable cross-protomer contact to W34 is needed to force H75 into the new tautomeric form.

**Table S1: ( $\tau$ ) and ( $\pi$ )-states chemical shifts (CS) of H75.** The chemical shifts were detected in  $^{13}\text{C}$ -2D-DQSQ,  $^{13}\text{C}$ -DQF, 2D-TEDOR and  $^{15}\text{N}$ -CP spectra (Fig. S6).

| Site           | ( $\tau$ ) CS<br>[ppm] | ( $\pi$ ) CS<br>[ppm] |
|----------------|------------------------|-----------------------|
| N              | 119.2                  | 114.1                 |
| N $\delta$ 1   | 250.4                  | 169.1                 |
| N $\epsilon$ 2 | 163.5                  | 255.2                 |
| CO             | 178.6                  | 177.8                 |
| C $\alpha$     | 58.2                   | 63.0                  |
| C $\beta$      | 28.8                   | 27.5                  |
| C $\gamma$     | 137.7                  | 131.8                 |
| C $\delta$ 2   | 117.2                  | 126.6                 |

## References

- Mehler M, *et al.* (2013) The EF loop in green proteorhodopsin affects conformation and photocycle dynamics. *Biophys. J.* 105(2):385-397.
- Maciejko J, *et al.* (2015) Visualizing Specific Cross-Protomer Interactions in the Homo-Oligomeric Membrane Protein Proteorhodopsin by Dynamic-Nuclear-Polarization-Enhanced Solid-State NMR. *J. Am. Chem. Soc.* 137(28):9032-9043.
- Maresca JA, Keffer JL, & Miller KJ (2016) Biochemical Analysis of Microbial Rhodopsins. *Current protocols in microbiology* 41:1F 4 1-1F 4 18.
- Ganapathy S, *et al.* (2015) Modulation of spectral properties and pump activity of proteorhodopsins by retinal analogues. *Biochem. J.* 467(2):333-343.
- Ganapathy S, *et al.* (2017) Retinal-Based Proton Pumping in the Near Infrared. *J. Am. Chem. Soc.* 139(6):2338-2344.
- Sauvee C, *et al.* (2013) Highly efficient, water-soluble polarizing agents for dynamic nuclear polarization at high frequency. *Angew. Chem. Int. Ed. Engl.* 52(41):10858-10861.
- Becker-Baldus J, *et al.* (2015) Enlightening the photoactive site of channelrhodopsin-2 by DNP-enhanced solid-state NMR spectroscopy. *Proc Natl Acad Sci U S A* 112(32):9896-9901.
- Mehler M, *et al.* (2017) Chromophore Distortions in Photointermediates of Proteorhodopsin Visualized by Dynamic Nuclear Polarization-Enhanced Solid-State NMR. *J. Am. Chem. Soc.* 139(45):16143-16153.
- Szeverenyi NM, Sullivan MJ, & Maciel GE (1982) Observation of spin exchange by two-dimensional fourier-transform C-13 cross polarization-magic-angle spinning. *J. Magn. Reson.* 47(3):462-475.
- Hong M (1999) Solid-state dipolar INADEQUATE NMR spectroscopy with a large double-quantum spectral width. *J. Magn. Reson.* 136(1):86-91.
- Jaroniec CP, Filip C, & Griffin RG (2002) 3D TEDOR NMR experiments for the simultaneous measurement of multiple carbon-nitrogen distances in uniformly ( $^{13}\text{C}$ ), ( $^{15}\text{N}$ )-labeled solids. *J. Am. Chem. Soc.* 124(36):10728-10742.
